# Supplementary material for: Preparation of Porous Ti/RuO2-IrO2@Pt, Ti/RuO2-TiO2@Pt and Ti/Y2O3-RuO2-TiO2@Pt Anodes for Efficient Electrocatalytic Decomposition of Tetracycline
Source: MDPI journal article supplement (doi:10.3390/molecules28052189), 2023-02-27
Supplement: s1 [file s1]

*Supporting Materials for*

**Preparation of porous Ti/RuO<sub>2</sub>-IrO<sub>2</sub>@Pt,  
Ti/RuO<sub>2</sub>-TiO<sub>2</sub>@Pt and Ti/Y<sub>2</sub>O<sub>3</sub>-RuO<sub>2</sub>-TiO<sub>2</sub>@Pt  
Anodes for Efficient Electrocatalytic  
decomposition of tetracycline**

Yunqing Zhu<sup>a\*</sup>, Bingqing Li<sup>a</sup>, Yongming Wang<sup>a</sup>, Tian Wang<sup>a</sup>, Junfeng Niu<sup>a</sup>

<sup>a</sup> School of Environmental Science and Engineering, Shaanxi University of Science and Technology, Xian 710021, China

**Corresponding author:**

\* Yunqing Zhu

Email address: zhuyunqing@sust.edu.cn

Address: School of Environmental Science and Engineering, Shaanxi University of Science and Technology, Weiyang University Park, Xian 710021, China

## Text S1. Electrode preparation

Nanoparticles were prepared by microemulsion method

Preparation of Pt-Ru-Ir nanoparticles: Firstly, 4.044g CTAB was added to 150 ml  $C_7H_8$  under intense mechanical agitation. After the mixed suspension was obtained,  $H_2PtCl_6 \cdot 6H_2O$  precursor solution was added to the suspension of the previous step by drop and stirred overnight. Then, the solution containing  $RuCl_3 \cdot 3H_2O$  and  $IrCl_3 \cdot xH_2O$  was added to the solution prepared in the previous step. After stirring for 30min, 0.223g NaOH solution was added, and the mixture was evenly stirred. Finally, platinum-Ruthenium-iridium nanoparticles were obtained after centrifugation, alcohol washing, and drying in an oven at 100 °C overnight.

Preparation of Pt-Ru-Ti nanoparticles: Firstly, 4.044g CTAB was added to 150 ml  $C_7H_8$  under intense mechanical agitation. After the mixed suspension was obtained,  $H_2PtCl_6 \cdot 6H_2O$  precursor solution was added to the suspension of the previous step by drop and stirred overnight. Then, the solution containing  $RuCl_3 \cdot 3H_2O$  and  $TiCl_3$  was added to the solution prepared in the previous step. After stirring for 30min, 0.223g NaOH solution was added, and the mixture was evenly stirred. Finally, platinum-Ruthenium-iridium nanoparticles were obtained after centrifugation, alcohol washing, and drying in an oven at 100 °C overnight.

Preparation of Pt-Ru-Ti-Y nanoparticles: Firstly, 4.044g CTAB was added to 150 ml  $C_7H_8$  under intense mechanical agitation. After the mixed suspension was obtained,  $H_2PtCl_6 \cdot 6H_2O$  precursor solution was added to the suspension of the previous step by drop and stirred overnight. Then, the solution containing  $RuCl_3 \cdot 3H_2O$ 、 $TiCl_3$  and  $Y(NO_3)_3 \cdot 6H_2O$  was added to the solution prepared in the previous step. After stirring for 30min, 0.223g NaOH solution was added, and the mixture was evenly stirred. Finally, platinum-Ruthenium-iridium nanoparticles were obtained after centrifugation, alcohol washing, and drying in an oven at 100 °C overnight.

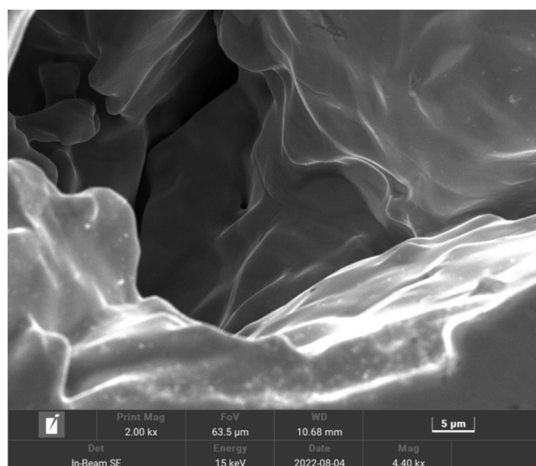

**Figure S1.** SEM image of porous Ti substrate

**Table S1**

Pore size parameters of porous Ti-based composite electrodes

| Electrode                                                             | Average pore<br>size ( $\mu\text{m}$ ) | Total hole<br>capacity ( $\text{mL/g}$ ) | Total hole<br>area ( $\text{m}^2/\text{g}$ ) |
|-----------------------------------------------------------------------|----------------------------------------|------------------------------------------|----------------------------------------------|
| Porous Ti                                                             | 24.47                                  | 0.082                                    | 0.013                                        |
| Porous Ti/ $\text{RuO}_2\text{-IrO}_2\text{@Pt}$                      | 10.89                                  | 0.093                                    | 0.034                                        |
| Porous Ti/ $\text{RuO}_2\text{-TiO}_2\text{@Pt}$                      | 14.84                                  | 0.092                                    | 0.025                                        |
| Porous Ti/ $\text{Y}_2\text{O}_3\text{-RuO}_2\text{-TiO}_2\text{@Pt}$ | 12.64                                  | 0.09                                     | 0.028                                        |

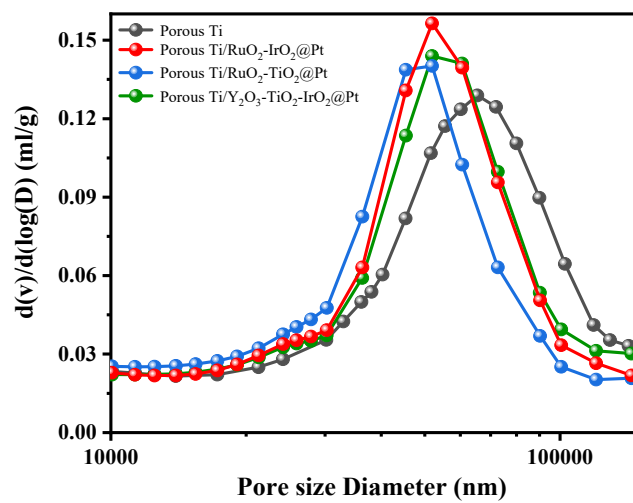

**Figure S2.** Comparison of the piezometric mercury of porous Ti, porous Ti/RuO<sub>2</sub>-IrO<sub>2</sub>@Pt, porous Ti/RuO<sub>2</sub>-TiO<sub>2</sub>@Pt, porous Ti/Y<sub>2</sub>O<sub>3</sub>-RuO<sub>2</sub>-TiO<sub>2</sub>@Pt.

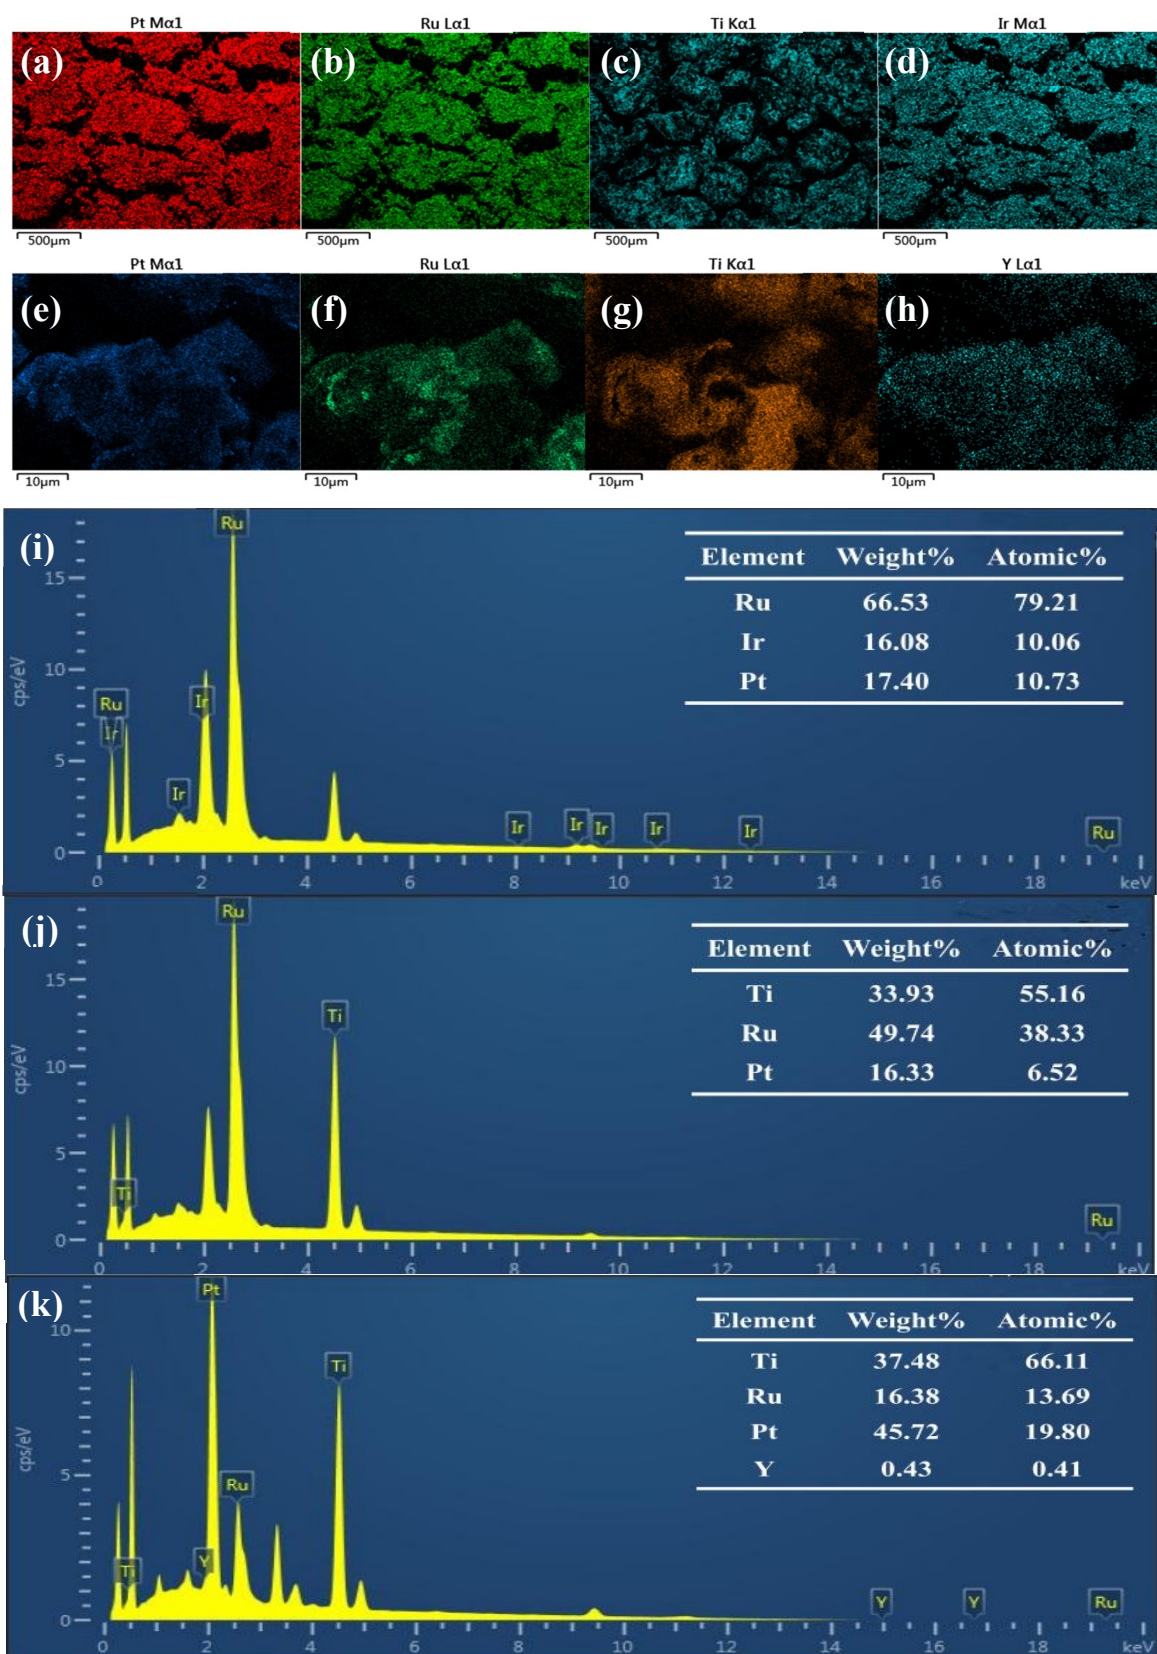

**Figure S3.** Mapping of porous Ti/RuO<sub>2</sub>-IrO<sub>2</sub>@Pt, porous Ti/RuO<sub>2</sub>-TiO<sub>2</sub>@Pt, porous Ti/Y<sub>2</sub>O<sub>3</sub>-RuO<sub>2</sub>-TiO<sub>2</sub>@Pt electrodes (a-h), EDS of (i) porous Ti/RuO<sub>2</sub>-IrO<sub>2</sub>@Pt, (j) porous Ti/RuO<sub>2</sub>-TiO<sub>2</sub>@Pt, (h) porous Ti/Y<sub>2</sub>O<sub>3</sub>-RuO<sub>2</sub>-TiO<sub>2</sub>@Pt electrodes.

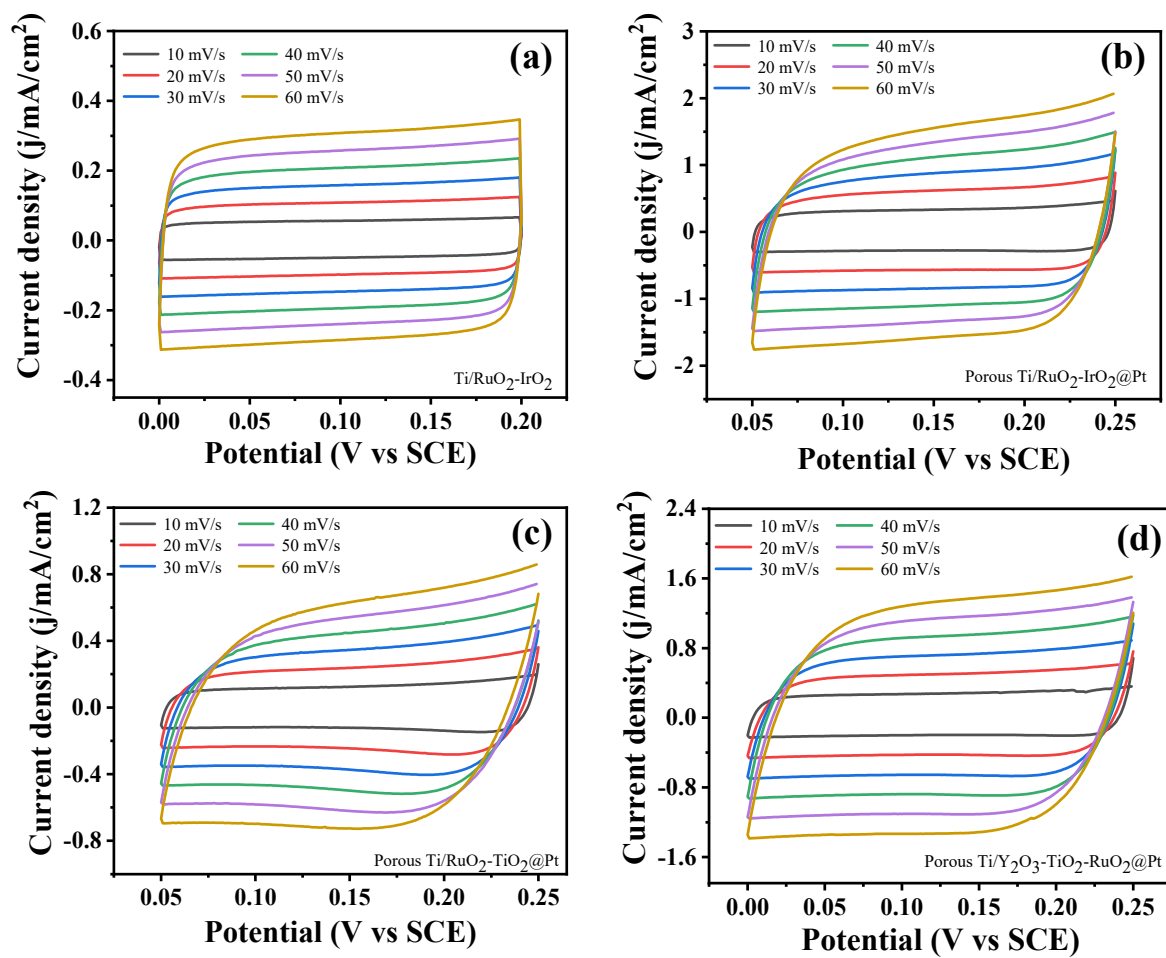

**Figure S4.** CV curves of (a) porous Ti/RuO<sub>2</sub>-IrO<sub>2</sub>@Pt, (b) porous Ti/RuO<sub>2</sub>-TiO<sub>2</sub>@Pt, (c) porous Ti/Y<sub>2</sub>O<sub>3</sub>-RuO<sub>2</sub>-TiO<sub>2</sub>@Pt, (d) Ti/RuO<sub>2</sub>-IrO<sub>2</sub> electrodes at different scanning rates.

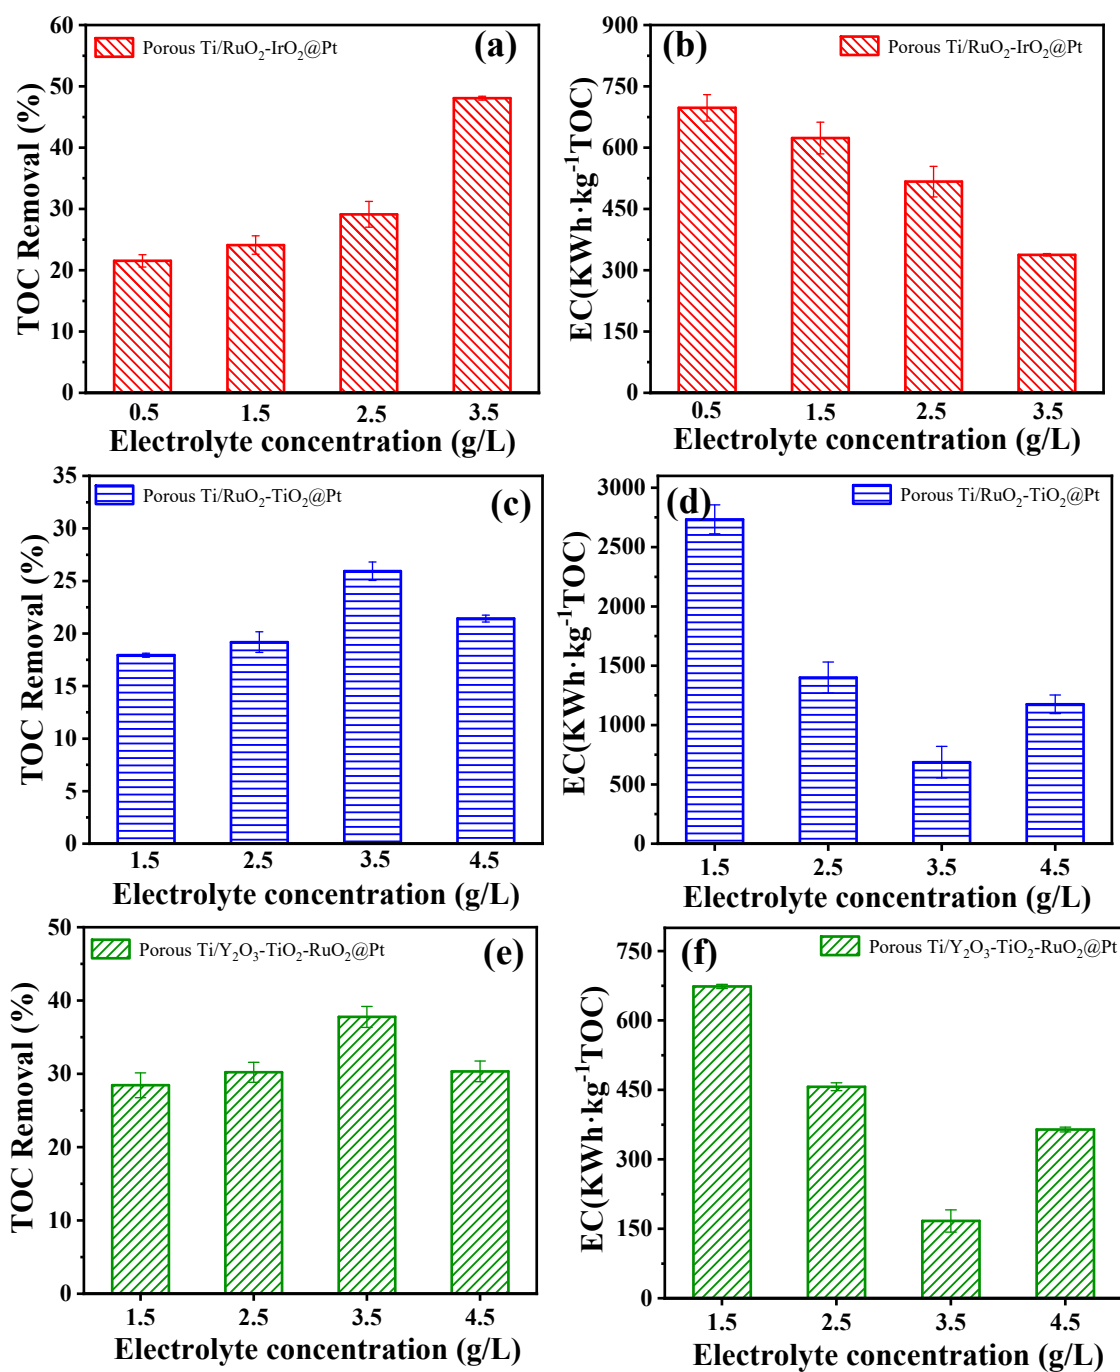

**Figure S5.** Effect of electrolyte concentration on TOC and energy consumption of tetracycline. (a,b) porous Ti/RuO<sub>2</sub>-IrO<sub>2</sub>@Pt, (c,d) porous Ti/RuO<sub>2</sub>-TiO<sub>2</sub>@Pt, (e,f) porous Ti/Y<sub>2</sub>O<sub>3</sub>-RuO<sub>2</sub>-TiO<sub>2</sub>@Pt electrodes.

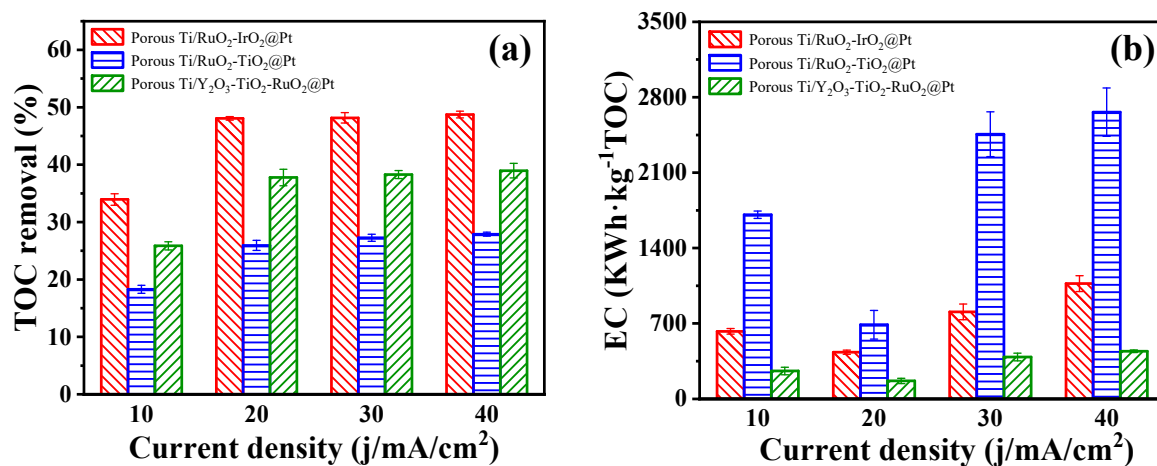

**Figure S6.** Effect of current density on TOC and energy consumption of tetracycline. (a) TOC removal. (b) TOC energy consumption.

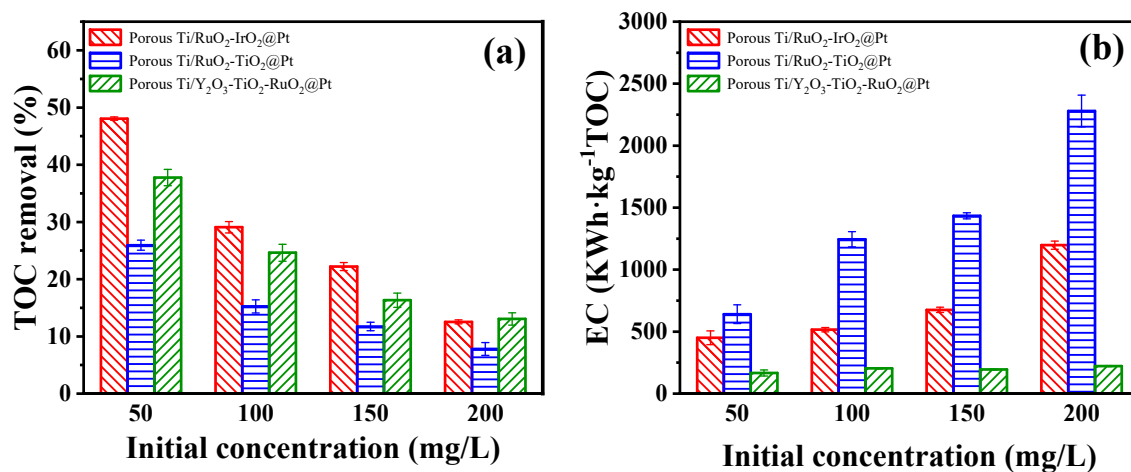

**Figure S7.** Effect of initial concentration on TOC and energy consumption of tetracycline. (a) TOC removal. (b) TOC energy consumption.



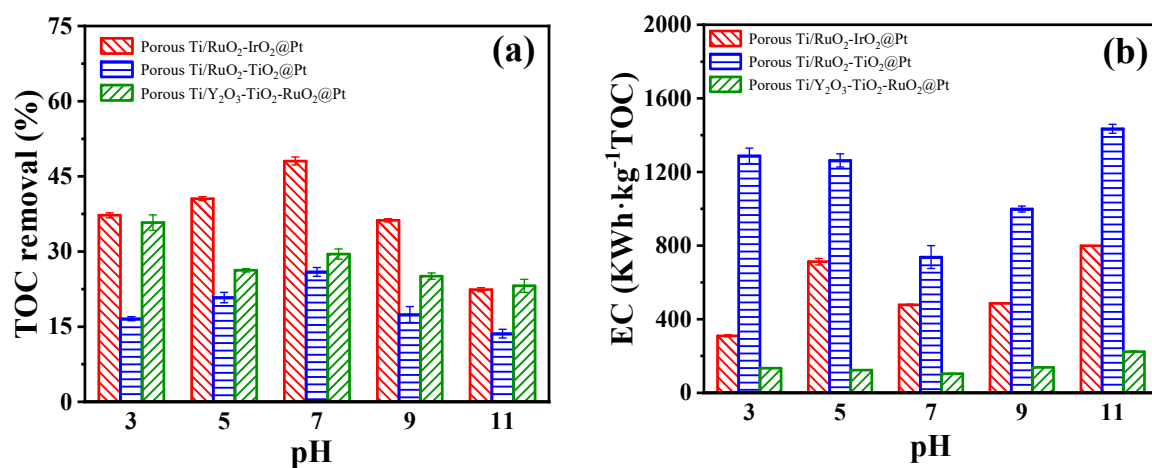

**Figure S8.** Effect of pH on TOC and energy consumption of tetracycline. (a) TOC removal (b) TOC energy consumption

Table S2

Rate constants of pseudo-first-order kinetic models of tetracycline under different parameters

| Parameters                                       |                                                                                 | k (min <sup>-1</sup> )                           |      | R <sup>2</sup> |      |
|--------------------------------------------------|---------------------------------------------------------------------------------|--------------------------------------------------|------|----------------|------|
| electrolyte type                                 | Porous Ti/RuO <sub>2</sub> -IrO <sub>2</sub> @Pt                                | NaCl                                             | 0.09 | 0.99           |      |
|                                                  |                                                                                 | Na <sub>2</sub> SO <sub>4</sub>                  | 0.01 | 0.99           |      |
|                                                  | Porous Ti/RuO <sub>2</sub> -TiO <sub>2</sub> @Pt                                | NaCl                                             | 0.06 | 0.99           |      |
|                                                  |                                                                                 | Na <sub>2</sub> SO <sub>4</sub>                  | 0.02 | 0.99           |      |
|                                                  | Porous Ti/Y <sub>2</sub> O <sub>3</sub> -RuO <sub>2</sub> -TiO <sub>2</sub> @Pt | NaCl                                             | 0.55 | 0.98           |      |
|                                                  |                                                                                 | Na <sub>2</sub> SO <sub>4</sub>                  | 0.02 | 0.95           |      |
| electrolyte concentration (g/L)                  | Porous Ti/RuO <sub>2</sub> -IrO <sub>2</sub> @Pt                                | 0.5                                              | 0.04 | 0.95           |      |
|                                                  |                                                                                 | 1.5                                              | 0.06 | 0.93           |      |
|                                                  |                                                                                 | 2.5                                              | 0.07 | 0.94           |      |
|                                                  |                                                                                 | 3.5                                              | 0.09 | 0.99           |      |
|                                                  |                                                                                 | 1.5                                              | 0.03 | 0.99           |      |
|                                                  | Porous Ti/RuO <sub>2</sub> -TiO <sub>2</sub> @Pt                                | 2.5                                              | 0.04 | 0.99           |      |
|                                                  |                                                                                 | 3.5                                              | 0.06 | 0.99           |      |
|                                                  |                                                                                 | 4.5                                              | 0.05 | 0.98           |      |
|                                                  |                                                                                 | 1.5                                              | 0.32 | 0.99           |      |
|                                                  |                                                                                 | 2.5                                              | 0.48 | 0.99           |      |
|                                                  | Porous Ti/Y <sub>2</sub> O <sub>3</sub> -RuO <sub>2</sub> -TiO <sub>2</sub> @Pt | 3.5                                              | 0.55 | 0.98           |      |
|                                                  |                                                                                 | 4.5                                              | 0.41 | 0.99           |      |
|                                                  |                                                                                 | 10                                               | 0.04 | 0.99           |      |
|                                                  |                                                                                 | 20                                               | 0.11 | 0.96           |      |
|                                                  |                                                                                 | 30                                               | 0.12 | 0.96           |      |
|                                                  | current density (mA/cm <sup>2</sup> )                                           | Porous Ti/RuO <sub>2</sub> -IrO <sub>2</sub> @Pt | 40   | 0.13           | 0.94 |
|                                                  |                                                                                 |                                                  | 10   | 0.03           | 0.99 |
|                                                  |                                                                                 |                                                  | 20   | 0.06           | 0.99 |
| 30                                               |                                                                                 |                                                  | 0.06 | 0.99           |      |
| Porous Ti/RuO <sub>2</sub> -TiO <sub>2</sub> @Pt |                                                                                 | 40                                               | 0.08 | 0.99           |      |
|                                                  |                                                                                 | 10                                               | 0.23 | 0.99           |      |
|                                                  |                                                                                 | 20                                               | 0.55 | 0.98           |      |
|                                                  |                                                                                 | 30                                               | 1.24 | 0.98           |      |
|                                                  |                                                                                 | 40                                               | 1.29 | 0.99           |      |
|                                                  |                                                                                 | 50                                               | 0.12 | 0.96           |      |
|                                                  |                                                                                 | 100                                              | 0.08 | 0.98           |      |
|                                                  |                                                                                 | 150                                              | 0.06 | 0.95           |      |
| initial concentration (mg/L)                     | Porous Ti/RuO <sub>2</sub> -IrO <sub>2</sub> @Pt                                | 200                                              | 0.05 | 0.98           |      |
|                                                  |                                                                                 | 50                                               | 0.06 | 0.99           |      |
|                                                  |                                                                                 | 100                                              | 0.04 | 0.99           |      |
|                                                  |                                                                                 | 150                                              | 0.03 | 0.99           |      |
|                                                  | Porous Ti/Y <sub>2</sub> O <sub>3</sub> -RuO <sub>2</sub> -TiO <sub>2</sub> @Pt | 200                                              | 0.02 | 0.99           |      |
|                                                  |                                                                                 | 50                                               | 0.55 | 0.98           |      |
|                                                  |                                                                                 | 100                                              | 0.22 | 0.99           |      |
|                                                  |                                                                                 | 150                                              | 0.16 | 0.99           |      |
|                                                  |                                                                                 |                                                  |      |                |      |
|                                                  |                                                                                 |                                                  |      |                |      |
|                                                  |                                                                                 |                                                  |      |                |      |
|                                                  |                                                                                 |                                                  |      |                |      |
|                                                  |                                                                                 |                                                  |      |                |      |
|                                                  |                                                                                 |                                                  |      |                |      |
|                                                  |                                                                                 |                                                  |      |                |      |
|                                                  |                                                                                 |                                                  |      |                |      |
|                                                  |                                                                                 |                                                  |      |                |      |
|                                                  |                                                                                 |                                                  |      |                |      |
|                                                  |                                                                                 |                                                  |      |                |      |
|                                                  |                                                                                 |                                                  |      |                |      |
|                                                  |                                                                                 |                                                  |      |                |      |
|                                                  |                                                                                 |                                                  |      |                |      |
|                                                  |                                                                                 |                                                  |      |                |      |
|                                                  |                                                                                 |                                                  |      |                |      |
|                                                  |                                                                                 |                                                  |      |                |      |
|                                                  |                                                                                 |                                                  |      |                |      |
|                                                  |                                                                                 |                                                  |      |                |      |
|                                                  |                                                                                 |                                                  |      |                |      |
|                                                  |                                                                                 |                                                  |      |                |      |
|                                                  |                                                                                 |                                                  |      |                |      |
|                                                  |                                                                                 |                                                  |      |                |      |
|                                                  |                                                                                 |                                                  |      |                |      |
|                                                  |                                                                                 |                                                  |      |                |      |
|                                                  |                                                                                 |                                                  |      |                |      |
|                                                  |                                                                                 |                                                  |      |                |      |
|                                                  |                                                                                 |                                                  |      |                |      |
|                                                  |                                                                                 |                                                  |      |                |      |
|                                                  |                                                                                 |                                                  |      |                |      |
|                                                  |                                                                                 |                                                  |      |                |      |
|                                                  |                                                                                 |                                                  |      |                |      |
|                                                  |                                                                                 |                                                  |      |                |      |
|                                                  |                                                                                 |                                                  |      |                |      |
|                                                  |                                                                                 |                                                  |      |                |      |
|                                                  |                                                                                 |                                                  |      |                |      |
|                                                  |                                                                                 |                                                  |      |                |      |
|                                                  |                                                                                 |                                                  |      |                |      |
|                                                  |                                                                                 |                                                  |      |                |      |
|                                                  |                                                                                 |                                                  |      |                |      |
|                                                  |                                                                                 |                                                  |      |                |      |
|                                                  |                                                                                 |                                                  |      |                |      |
|                                                  |                                                                                 |                                                  |      |                |      |
|                                                  |                                                                                 |                                                  |      |                |      |
|                                                  |                                                                                 |                                                  |      |                |      |
|                                                  |                                                                                 |                                                  |      |                |      |
|                                                  |                                                                                 |                                                  |      |                |      |
|                                                  |                                                                                 |                                                  |      |                |      |
|                                                  |                                                                                 |                                                  |      |                |      |
|                                                  |                                                                                 |                                                  |      |                |      |
|                                                  |                                                                                 |                                                  |      |                |      |
|                                                  |                                                                                 |                                                  |      |                |      |
|                                                  |                                                                                 |                                                  |      |                |      |
|                                                  |                                                                                 |                                                  |      |                |      |
|                                                  |                                                                                 |                                                  |      |                |      |
|                                                  |                                                                                 |                                                  |      |                |      |
|                                                  |                                                                                 |                                                  |      |                |      |
|                                                  |                                                                                 |                                                  |      |                |      |
|                                                  |                                                                                 |                                                  |      |                |      |
|                                                  |                                                                                 |                                                  |      |                |      |
|                                                  |                                                                                 |                                                  |      |                |      |
|                                                  |                                                                                 |                                                  |      |                |      |
|                                                  |                                                                                 |                                                  |      |                |      |
|                                                  |                                                                                 |                                                  |      |                |      |
|                                                  |                                                                                 |                                                  |      |                |      |
|                                                  |                                                                                 |                                                  |      |                |      |
|                                                  |                                                                                 |                                                  |      |                |      |
|                                                  |                                                                                 |                                                  |      |                |      |
|                                                  |                                                                                 |                                                  |      |                |      |
|                                                  |                                                                                 |                                                  |      |                |      |
|                                                  |                                                                                 |                                                  |      |                |      |
|                                                  |                                                                                 |                                                  |      |                |      |
|                                                  |                                                                                 |                                                  |      |                |      |
|                                                  |                                                                                 |                                                  |      |                |      |
|                                                  |                                                                                 |                                                  |      |                |      |
|                                                  |                                                                                 |                                                  |      |                |      |
|                                                  |                                                                                 |                                                  |      |                |      |
|                                                  |                                                                                 |                                                  |      |                |      |
|                                                  |                                                                                 |                                                  |      |                |      |
|                                                  |                                                                                 |                                                  |      |                |      |
|                                                  |                                                                                 |                                                  |      |                |      |
|                                                  |                                                                                 |                                                  |      |                |      |
|                                                  |                                                                                 |                                                  |      |                |      |
|                                                  |                                                                                 |                                                  |      |                |      |
|                                                  |                                                                                 |                                                  |      |                |      |
|                                                  |                                                                                 |                                                  |      |                |      |
|                                                  |                                                                                 |                                                  |      |                |      |
|                                                  |                                                                                 |                                                  |      |                |      |
|                                                  |                                                                                 |                                                  |      |                |      |
|                                                  |                                                                                 |                                                  |      |                |      |
|                                                  |                                                                                 |                                                  |      |                |      |
|                                                  |                                                                                 |                                                  |      |                |      |
|                                                  |                                                                                 |                                                  |      |                |      |
|                                                  |                                                                                 |                                                  |      |                |      |
|                                                  |                                                                                 |                                                  |      |                |      |
|                                                  |                                                                                 |                                                  |      |                |      |
|                                                  |                                                                                 |                                                  |      |                |      |
|                                                  |                                                                                 |                                                  |      |                |      |
|                                                  |                                                                                 |                                                  |      |                |      |
|                                                  |                                                                                 |                                                  |      |                |      |
|                                                  |                                                                                 |                                                  |      |                |      |
|                                                  |                                                                                 |                                                  |      |                |      |
|                                                  |                                                                                 |                                                  |      |                |      |
|                                                  |                                                                                 |                                                  |      |                |      |
|                                                  |                                                                                 |                                                  |      |                |      |
|                                                  |                                                                                 |                                                  |      |                |      |
|                                                  |                                                                                 |                                                  |      |                |      |
|                                                  |                                                                                 |                                                  |      |                |      |
|                                                  |                                                                                 |                                                  |      |                |      |
|                                                  |                                                                                 |                                                  |      |                |      |
|                                                  |                                                                                 |                                                  |      |                |      |
|                                                  |                                                                                 |                                                  |      |                |      |
|                                                  |                                                                                 |                                                  |      |                |      |
|                                                  |                                                                                 |                                                  |      |                |      |
|                                                  |                                                                                 |                                                  |      |                |      |
|                                                  |                                                                                 |                                                  |      |                |      |
|                                                  |                                                                                 |                                                  |      |                |      |
|                                                  |                                                                                 |                                                  |      |                |      |
|                                                  |                                                                                 |                                                  |      |                |      |
|                                                  |                                                                                 |                                                  |      |                |      |
|                                                  |                                                                                 |                                                  |      |                |      |
|                                                  |                                                                                 |                                                  |      |                |      |
|                                                  |                                                                                 |                                                  |      |                |      |
|                                                  |                                                                                 |                                                  |      |                |      |
|                                                  |                                                                                 |                                                  |      |                |      |
|                                                  |                                                                                 |                                                  |      |                |      |
|                                                  |                                                                                 |                                                  |      |                |      |
|                                                  |                                                                                 |                                                  |      |                |      |
|                                                  |                                                                                 |                                                  |      |                |      |
|                                                  |                                                                                 |                                                  |      |                |      |
|                                                  |                                                                                 |                                                  |      |                |      |
|                                                  |                                                                                 |                                                  |      |                |      |
|                                                  |                                                                                 |                                                  |      |                |      |
|                                                  |                                                                                 |                                                  |      |                |      |
|                                                  |                                                                                 |                                                  |      |                |      |
|                                                  |                                                                                 |                                                  |      |                |      |
|                                                  |                                                                                 |                                                  |      |                |      |
|                                                  |                                                                                 |                                                  |      |                |      |
|                                                  |                                                                                 |                                                  |      |                |      |
|                                                  |                                                                                 |                                                  |      |                |      |
|                                                  |                                                                                 |                                                  |      |                |      |
|                                                  |                                                                                 |                                                  |      |                |      |
|                                                  |                                                                                 |                                                  |      |                |      |
|                                                  |                                                                                 |                                                  |      |                |      |
|                                                  |                                                                                 |                                                  |      |                |      |
|                                                  |                                                                                 |                                                  |      |                |      |
|                                                  |                                                                                 |                                                  |      |                |      |
|                                                  |                                                                                 |                                                  |      |                |      |
|                                                  |                                                                                 |                                                  |      |                |      |
|                                                  |                                                                                 |                                                  |      |                |      |
|                                                  |                                                                                 |                                                  |      |                |      |
|                                                  |                                                                                 |                                                  |      |                |      |
|                                                  |                                                                                 |                                                  |      |                |      |
|                                                  |                                                                                 |                                                  |      |                |      |
|                                                  |                                                                                 |                                                  |      |                |      |
|                                                  |                                                                                 |                                                  |      |                |      |
|                                                  |                                                                                 |                                                  |      |                |      |
|                                                  |                                                                                 |                                                  |      |                |      |
|                                                  |                                                                                 |                                                  |      |                |      |
|                                                  |                                                                                 |                                                  |      |                |      |
|                                                  |                                                                                 |                                                  |      |                |      |
|                                                  |                                                                                 |                                                  |      |                |      |
|                                                  |                                                                                 |                                                  |      |                |      |
|                                                  |                                                                                 |                                                  |      |                |      |
|                                                  |                                                                                 |                                                  |      |                |      |
|                                                  |                                                                                 |                                                  |      |                |      |
|                                                  |                                                                                 |                                                  |      |                |      |
|                                                  |                                                                                 |                                                  |      |                |      |
|                                                  |                                                                                 |                                                  |      |                |      |
|                                                  |                                                                                 |                                                  |      |                |      |
|                                                  |                                                                                 |                                                  |      |                |      |
|                                                  |                                                                                 |                                                  |      |                |      |
|                                                  |                                                                                 |                                                  |      |                |      |
|                                                  |                                                                                 |                                                  |      |                |      |
|                                                  |                                                                                 |                                                  |      |                |      |
|                                                  |                                                                                 |                                                  |      |                |      |
|                                                  |                                                                                 |                                                  |      |                |      |
|                                                  |                                                                                 |                                                  |      |                |      |
|                                                  |                                                                                 |                                                  |      |                |      |
|                                                  |                                                                                 |                                                  |      |                |      |
|                                                  |                                                                                 |                                                  |      |                |      |
|                                                  |                                                                                 |                                                  |      |                |      |
|                                                  |                                                                                 |                                                  |      |                |      |
|                                                  |                                                                                 |                                                  |      |                |      |
|                                                  |                                                                                 |                                                  |      |                |      |
|                                                  |                                                                                 |                                                  |      |                |      |
|                                                  |                                                                                 |                                                  |      |                |      |
|                                                  |                                                                                 |                                                  |      |                |      |
|                                                  |                                                                                 |                                                  |      |                |      |
|                                                  |                                                                                 |                                                  |      |                |      |
|                                                  |                                                                                 |                                                  |      |                |      |
|                                                  |                                                                                 |                                                  |      |                |      |
|                                                  |                                                                                 |                                                  |      |                |      |
|                                                  |                                                                                 |                                                  |      |                |      |
|                                                  |                                                                                 |                                                  |      |                |      |
|                                                  |                                                                                 |                                                  |      |                |      |
|                                                  |                                                                                 |                                                  |      |                |      |
|                                                  |                                                                                 |                                                  |      |                |      |
|                                                  |                                                                                 |                                                  |      |                |      |
|                                                  |                                                                                 |                                                  |      |                |      |
|                                                  |                                                                                 |                                                  |      |                |      |
|                                                  |                                                                                 |                                                  |      |                |      |
|                                                  |                                                                                 |                                                  |      |                |      |
|                                                  |                                                                                 |                                                  |      |                |      |
|                                                  |                                                                                 |                                                  |      |                |      |
|                                                  |                                                                                 |                                                  |      |                |      |
|                                                  |                                                                                 |                                                  |      |                |      |
|                                                  |                                                                                 |                                                  |      |                |      |
|                                                  |                                                                                 |                                                  |      |                |      |
|                                                  |                                                                                 |                                                  |      |                |      |
|                                                  |                                                                                 |                                                  |      |                |      |
|                                                  |                                                                                 |                                                  |      |                |      |
|                                                  |                                                                                 |                                                  |      |                |      |
|                                                  |                                                                                 |                                                  |      |                |      |
|                                                  |                                                                                 |                                                  |      |                |      |
|                                                  |                                                                                 |                                                  |      |                |      |
|                                                  |                                                                                 |                                                  |      |                |      |
|                                                  |                                                                                 |                                                  |      |                |      |
|                                                  |                                                                                 |                                                  |      |                |      |
|                                                  |                                                                                 |                                                  |      |                |      |
|                                                  |                                                                                 |                                                  |      |                |      |
|                                                  |                                                                                 |                                                  |      |                |      |
|                                                  |                                                                                 |                                                  |      |                |      |
|                                                  |                                                                                 |                                                  |      |                |      |
|                                                  |                                                                                 |                                                  |      |                |      |
|                                                  |                                                                                 |                                                  |      |                |      |
|                                                  |                                                                                 |                                                  |      |                |      |
|                                                  |                                                                                 |                                                  |      |                |      |
|                                                  |                                                                                 |                                                  |      |                |      |
|                                                  |                                                                                 |                                                  |      |                |      |

Table S3

Rate constants of pseudo-first-order kinetic models of tetracycline under optimal parameters

| Parameters                                                                      | k ( $\text{min}^{-1}$ ) | R <sup>2</sup> |
|---------------------------------------------------------------------------------|-------------------------|----------------|
| Ti/RuO <sub>2</sub> -IrO <sub>2</sub>                                           | 0.03                    | 0.96           |
| Porous Ti/RuO <sub>2</sub> -IrO <sub>2</sub> @Pt                                | 0.09                    | 0.99           |
| Porous Ti/RuO <sub>2</sub> -TiO <sub>2</sub> @Pt                                | 0.06                    | 0.99           |
| Porous Ti/Y <sub>2</sub> O <sub>3</sub> -RuO <sub>2</sub> -TiO <sub>2</sub> @Pt | 0.55                    | 0.98           |
